# Supplementary material for: An Integrative Review of Recovery Services to Improve the Lives of Adults Living with Severe Mental Illness
Source: MDPI journal article supplement (doi:10.3390/ijerph18168873), 2021-08-23
Supplement: s1 [file s1]

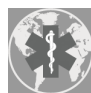

**Table S1.** Data extraction forms.

|                                                                                                                                                  |                                                                                                       |
|--------------------------------------------------------------------------------------------------------------------------------------------------|-------------------------------------------------------------------------------------------------------|
| <b>Study ID</b>                                                                                                                                  |                                                                                                       |
| <b>Study Details</b>                                                                                                                             |                                                                                                       |
| Citation                                                                                                                                         |                                                                                                       |
| Year of publication(s)                                                                                                                           |                                                                                                       |
| Author(s)                                                                                                                                        |                                                                                                       |
| Contact details of lead author                                                                                                                   |                                                                                                       |
| Funder / sponsoring organisation                                                                                                                 |                                                                                                       |
| Publication type                                                                                                                                 |                                                                                                       |
| Example:                                                                                                                                         |                                                                                                       |
| <ul style="list-style-type: none"><li>Journal article</li><li>Report (specify)</li><li>Case study</li><li>Other</li></ul>                        | Journal article                                                                                       |
| <b>Publication Source</b>                                                                                                                        |                                                                                                       |
| Methodology (if applicable)                                                                                                                      |                                                                                                       |
| <ul style="list-style-type: none"><li>Study design</li><li>Type of data</li><li>Data collection</li><li>Sampling</li><li>Data analysis</li></ul> |                                                                                                       |
| <ul style="list-style-type: none"><li>Participants/No. of studies included</li></ul>                                                             |                                                                                                       |
| Age range                                                                                                                                        |                                                                                                       |
| Sex                                                                                                                                              |                                                                                                       |
| Study setting                                                                                                                                    |                                                                                                       |
| The objective of the study                                                                                                                       |                                                                                                       |
| Study type                                                                                                                                       |                                                                                                       |
| Please specify the focus of the paper?                                                                                                           |                                                                                                       |
| <ul style="list-style-type: none"><li>Recovery</li><li>Disability support</li></ul>                                                              |                                                                                                       |
| Sector                                                                                                                                           |                                                                                                       |
| The paper may focus on one or more sectors, for example,                                                                                         |                                                                                                       |
| <ul style="list-style-type: none"><li>Occupational therapy</li><li>Recreational activities</li><li>Social care</li><li>Treatment</li></ul>       |                                                                                                       |
| <b>Disability support</b>                                                                                                                        | Please identify the model of disability support services for adult with mental illness?               |
| <b>Interventions</b>                                                                                                                             | Please identify any disability support interventions implemented for adult with mental illness?       |
| <b>Period of project implementation</b>                                                                                                          | Please state the period (months/years) of implementing the intervention                               |
| <b>Outcome of intervention</b>                                                                                                                   | Please state the outcome of the disability support intervention for adult with severe mental illness? |
| <b>Concept of Recovery</b>                                                                                                                       | Please specify the concept of recovery in treating adult with severe mental illness?                  |

|                                                                                                                            |                                                                                             |
|----------------------------------------------------------------------------------------------------------------------------|---------------------------------------------------------------------------------------------|
| Please describe the role of recovery in the social inclusion and community acceptance of adult with severe mental illness? |                                                                                             |
| Recovery intervention                                                                                                      | Please identify any recovery interventions implemented for adult with mental illness?       |
| Period of project implementation                                                                                           | Please state the period (months/years) of implementing the intervention                     |
| Outcome of intervention                                                                                                    | Please state the outcome of the recovery intervention for adult with severe mental illness? |
| Please report on any additional information on disability support and recovery services                                    |                                                                                             |
| Recommendation                                                                                                             |                                                                                             |
| Identifiable references to follow up                                                                                       |                                                                                             |

Table S2. Methodological Quality assessment Criteria.

| Reviewer 1                          |                                                                                                                                                                                                 |                          |                          |                          |
|-------------------------------------|-------------------------------------------------------------------------------------------------------------------------------------------------------------------------------------------------|--------------------------|--------------------------|--------------------------|
| Reviewer 2                          |                                                                                                                                                                                                 |                          |                          |                          |
| Author (s)                          |                                                                                                                                                                                                 |                          |                          |                          |
| Methods                             |                                                                                                                                                                                                 |                          |                          |                          |
| Study design                        |                                                                                                                                                                                                 |                          |                          |                          |
| Data                                |                                                                                                                                                                                                 |                          |                          |                          |
| Sampling                            |                                                                                                                                                                                                 |                          |                          |                          |
| Analysis                            |                                                                                                                                                                                                 |                          |                          |                          |
| Types of Study                      | Methodological Quality assessment Criteria                                                                                                                                                      | Yes                      | No                       | Can't tell               |
| Screening Questions (for all types) | Are there clear research questions or objectives?                                                                                                                                               | <input type="checkbox"/> | <input type="checkbox"/> | <input type="checkbox"/> |
|                                     | Do the collected data address the research question?                                                                                                                                            | <input type="checkbox"/> | <input type="checkbox"/> | <input type="checkbox"/> |
|                                     | <i>Further appraisal is not feasible when the answer is 'No' or 'Can't tell' to one or both screening questions</i>                                                                             |                          |                          |                          |
| Qualitative                         | 1.1 Is there congruity between the stated philosophical perspective and the research methodology?                                                                                               | <input type="checkbox"/> | <input type="checkbox"/> | <input type="checkbox"/> |
|                                     | 1.2 Are the sources of qualitative data (archives, documents, informants, observations) relevant to address the research question?                                                              | <input type="checkbox"/> | <input type="checkbox"/> | <input type="checkbox"/> |
|                                     | 1.3 Is the process for analysing qualitative data relevant to address the research question?                                                                                                    | <input type="checkbox"/> | <input type="checkbox"/> | <input type="checkbox"/> |
|                                     | 1.4 Are participants, and their voices, adequately represented? (adequate quotes and text been used to represent the concept discussed)                                                         | <input type="checkbox"/> | <input type="checkbox"/> | <input type="checkbox"/> |
|                                     | 1.5 Is there a statement locating the researcher culturally or theoretically? (Are the beliefs and values, and their potential influence on the study declared?)                                | <input type="checkbox"/> | <input type="checkbox"/> | <input type="checkbox"/> |
|                                     | 1.6. Is the influence of the researcher on the research, and vice-versa, addressed? ( <i>Addressing the potential for the researcher to either influence or to be influenced by the study</i> ) | <input type="checkbox"/> | <input type="checkbox"/> | <input type="checkbox"/> |

|                                                                                                   |                                                                                                                                                                                                                                          |                          |                                     |                          |
|---------------------------------------------------------------------------------------------------|------------------------------------------------------------------------------------------------------------------------------------------------------------------------------------------------------------------------------------------|--------------------------|-------------------------------------|--------------------------|
|                                                                                                   | 1.7. Do the conclusions drawn in the research report flow from the analysis, or interpretation, of the data?                                                                                                                             | <input type="checkbox"/> | <input type="checkbox"/>            | <input type="checkbox"/> |
|                                                                                                   | 1.8. Is the ethical issues adequately addressed?<br>(statement indicating appropriate ethics approval)                                                                                                                                   | <input type="checkbox"/> | <input type="checkbox"/>            | <input type="checkbox"/> |
| <b>Quantitative randomized controlled (trials)</b>                                                | 2.1. Is there a clear description of the randomization (or an appropriate sequence generation)?                                                                                                                                          | <input type="checkbox"/> | <input type="checkbox"/>            | <input type="checkbox"/> |
|                                                                                                   | 2.2. Is there a clear description of the allocation concealment or blinding when applicable)?                                                                                                                                            | <input type="checkbox"/> | <input type="checkbox"/>            | <input type="checkbox"/> |
|                                                                                                   | 2.3. Are there complete outcome data (80% or above)?                                                                                                                                                                                     | <input type="checkbox"/> | <input type="checkbox"/>            | <input type="checkbox"/> |
|                                                                                                   | 2.4. Is there low withdrawal/drop-out (below 20%)?                                                                                                                                                                                       | <input type="checkbox"/> | <input type="checkbox"/>            | <input type="checkbox"/> |
|                                                                                                   | 2.5. Are the groups comparable at baseline?                                                                                                                                                                                              | <input type="checkbox"/> | <input type="checkbox"/>            | <input type="checkbox"/> |
|                                                                                                   | 2.6. Are there complete outcome data?                                                                                                                                                                                                    | <input type="checkbox"/> | <input type="checkbox"/>            | <input type="checkbox"/> |
|                                                                                                   | 2.7. Are outcome assessors blinded to the intervention provided?                                                                                                                                                                         | <input type="checkbox"/> | <input type="checkbox"/>            | <input type="checkbox"/> |
|                                                                                                   | 2.8. Did the participants adhere to the assigned intervention?                                                                                                                                                                           | <input type="checkbox"/> | <input type="checkbox"/>            | <input type="checkbox"/> |
| <b>Quantitative non-randomized (Cohort study, case-control study, analytical cross-sectional)</b> | 3.1. Are participants recruited in a way that minimizes selection bias?                                                                                                                                                                  | <input type="checkbox"/> | <input type="checkbox"/>            | <input type="checkbox"/> |
|                                                                                                   | 3.2. Were the criteria for inclusion in the sample clearly defined?                                                                                                                                                                      | <input type="checkbox"/> | <input type="checkbox"/>            | <input type="checkbox"/> |
|                                                                                                   | 3.3. Were the study subjects and the setting described in detail?                                                                                                                                                                        | <input type="checkbox"/> | <input type="checkbox"/>            | <input type="checkbox"/> |
|                                                                                                   | 3.4. Were objective, standard criteria used for measurement of the condition?                                                                                                                                                            | <input type="checkbox"/> | <input type="checkbox"/>            | <input type="checkbox"/> |
|                                                                                                   | 3.5. Were the outcomes measured in a valid and reliable way?                                                                                                                                                                             | <input type="checkbox"/> | <input type="checkbox"/>            | <input type="checkbox"/> |
|                                                                                                   | 3.6. Was appropriate statistical analysis used?                                                                                                                                                                                          | <input type="checkbox"/> | <input type="checkbox"/>            | <input type="checkbox"/> |
|                                                                                                   | 3.7. Is the ethical issues adequately addressed?<br>(statement indicating appropriate ethics approval)                                                                                                                                   | <input type="checkbox"/> | <input type="checkbox"/>            | <input type="checkbox"/> |
|                                                                                                   | 3.8. Do the conclusions drawn in the research report flow from the analysis, or interpretation, of the data?                                                                                                                             | <input type="checkbox"/> | <input type="checkbox"/>            | <input type="checkbox"/> |
|                                                                                                   | 3.9. Are measurements appropriate (clear origin, or validity known, or standard instrument; and absence of contamination between groups when appropriate) regarding the exposure/intervention and outcomes?                              | <input type="checkbox"/> | <input type="checkbox"/>            | <input type="checkbox"/> |
|                                                                                                   | 3.11. In the groups being compared (exposed vs. non-exposed; with intervention vs. without; cases vs. controls), are the participants comparable, or do researchers take into account (control for) the difference between these groups? | <input type="checkbox"/> | <input checked="" type="checkbox"/> | <input type="checkbox"/> |
|                                                                                                   | 3.12. Are there complete outcome data (80% or above), and, when applicable, an acceptable response rate (60% or above), or an acceptable follow-up rate for cohort studies (depending on the duration of follow-up)?                     | <input type="checkbox"/> | <input type="checkbox"/>            | <input type="checkbox"/> |
| <b>Quantitative descriptive</b>                                                                   | 4.1. Is the sampling strategy relevant to address the quantitative research question (quantitative aspect of the mixed methods question)?                                                                                                | <input type="checkbox"/> | <input type="checkbox"/>            | <input type="checkbox"/> |
|                                                                                                   | 4.2. Is the sample representative of the population under-study?                                                                                                                                                                         | <input type="checkbox"/> | <input type="checkbox"/>            | <input type="checkbox"/> |
|                                                                                                   | 4.3. Are measurements appropriate (clear origin, or validity known, or standard instrument)?                                                                                                                                             | <input type="checkbox"/> | <input type="checkbox"/>            | <input type="checkbox"/> |
|                                                                                                   | 4.4. Is there an acceptable response rate (60% or above)?                                                                                                                                                                                | <input type="checkbox"/> | <input type="checkbox"/>            | <input type="checkbox"/> |
| <b>Mixed methods</b>                                                                              | 5.1. Is the mixed methods research design relevant to address the qualitative and quantitative research questions, or the qualitative and quantitative aspects of the mixed methods question?                                            | <input type="checkbox"/> | <input type="checkbox"/>            | <input type="checkbox"/> |
|                                                                                                   | 5.2. Is the integration of qualitative and quantitative data (or results relevant to address the research question?                                                                                                                      | <input type="checkbox"/> | <input type="checkbox"/>            | <input type="checkbox"/> |
|                                                                                                   | 5.3. Are the outputs of the integration of qualitative and quan-                                                                                                                                                                         | <input type="checkbox"/> | <input type="checkbox"/>            | <input type="checkbox"/> |

|                                                                                                                                                                                                                                      |                                                                                                                                                                              |                                                                                                                         |                          |                          |
|--------------------------------------------------------------------------------------------------------------------------------------------------------------------------------------------------------------------------------------|------------------------------------------------------------------------------------------------------------------------------------------------------------------------------|-------------------------------------------------------------------------------------------------------------------------|--------------------------|--------------------------|
| titative components adequately interpreted?                                                                                                                                                                                          |                                                                                                                                                                              |                                                                                                                         |                          |                          |
| 5.4                                                                                                                                                                                                                                  | Are divergences and inconsistencies between quantitative and qualitative results adequately addressed?                                                                       | <input type="checkbox"/>                                                                                                | <input type="checkbox"/> | <input type="checkbox"/> |
| 5.5                                                                                                                                                                                                                                  | Do the different components of the study adhere to the quality criteria of each tradition of the methods involved?                                                           | <input type="checkbox"/>                                                                                                | <input type="checkbox"/> | <input type="checkbox"/> |
| 5.6                                                                                                                                                                                                                                  | Is appropriate consideration given to the limitations associated with this integration, e.g., the divergence of qualitative and quantitative data in a triangulation design? | <input type="checkbox"/>                                                                                                | <input type="checkbox"/> | <input type="checkbox"/> |
| <i>Apply the criteria use for qualitative data for the qualitative component and quantitative component respectively.</i>                                                                                                            |                                                                                                                                                                              |                                                                                                                         |                          |                          |
| <b>Overall Quality Score</b>                                                                                                                                                                                                         | Comments on score: The overall quality score for the paper is.... % and so meet the criteria for assigning high quality                                                      | <input type="checkbox"/> Low (25%)<br><input type="checkbox"/> Medium (50%)<br><input type="checkbox"/> High 70% - 100% |                          |                          |
| <b>Reviewer 2</b>                                                                                                                                                                                                                    | Comments:                                                                                                                                                                    |                                                                                                                         |                          |                          |
| NB: Scoring metrics. The score can be computed by counting the total number of "yes" and expressing them as a percentage ie below 25% represent Low Quality, 50% represent Medium Quality, and 70% and above represent high Quality. |                                                                                                                                                                              |                                                                                                                         |                          |                          |
